# Supplementary material for: High expression of GNA13 is associated with poor prognosis in hepatocellular carcinoma
Source: PubMed Central journal article supplement (PMC5121652; doi:10.1038/srep35948), 2016-11-24

# High expression of GNA13 is associated with poor prognosis in hepatocellular carcinoma

Yi Xu<sup>1\*</sup>, Jian Rong<sup>2\*</sup>, Shiyu Duan<sup>3,4\*</sup>, Cui Chen<sup>1</sup>, Yin Li<sup>5</sup>, Baogang Peng<sup>6</sup>, Bin Yi<sup>2</sup>, Zhousan Zheng<sup>1</sup>, Ying Gao<sup>1</sup>, Keping Wang<sup>7</sup>, Miao Yun<sup>8,9</sup>, Huiwen Weng<sup>1</sup>, Jiaying Zhang<sup>1,8</sup> & Sheng Ye<sup>1</sup>

<sup>1</sup>Department of Oncology, The First Affiliated Hospital, Sun Yat-Sen University, Guangzhou 510080, China, <sup>2</sup>Department of Extracorporeal Circulation, The First Affiliated Hospital, Sun Yat-sen University, Guangzhou 510080, China, <sup>3</sup>Department of Pathology, Nanfang Hospital, Southern Medical University, Guangzhou 510515, China, <sup>4</sup>Department of Pathology, School of Basic Medical Sciences, Southern Medical University, Guangzhou 510515, China, <sup>5</sup>Department of Gastrointestinal Surgery, The First Affiliated Hospital, Sun Yat-sen University, Guangzhou 510080, China, <sup>6</sup>Department of Liver Surgery, The First Affiliated Hospital, Sun Yat-sen University, Guangzhou 510080, China, <sup>7</sup>Department of Surgical Laboratory, The First Affiliated Hospital, Sun Yat-Sen University, Guangzhou 510080, China, <sup>8</sup>Sun Yat-sen University Cancer Center, State Key Laboratory of Oncology in South China, Collaborative Innovation Center for Cancer Medicine, Guangzhou 510060, China, <sup>9</sup>Department of Ultrasound, Cancer Center, Sun Yat-Sen University, Guangzhou 510060, China

Correspondence and requests for materials should be addressed to J.X.Z. (zjxlundy@hotmail.com) or S.Y. (yes20111212@163.com)

\*These authors contributed equally to this work.

**Supplementary figure legends**

**Supplementary Figure S1. Effect of GNA13 overexpression on the expression of P-AKT and P-ERK.**

Western blotting analysis revealed that overexpression of GNA13 had no obvious effect on the protein levels of P-AKT and P-ERK.

## Supplementary Figure S1

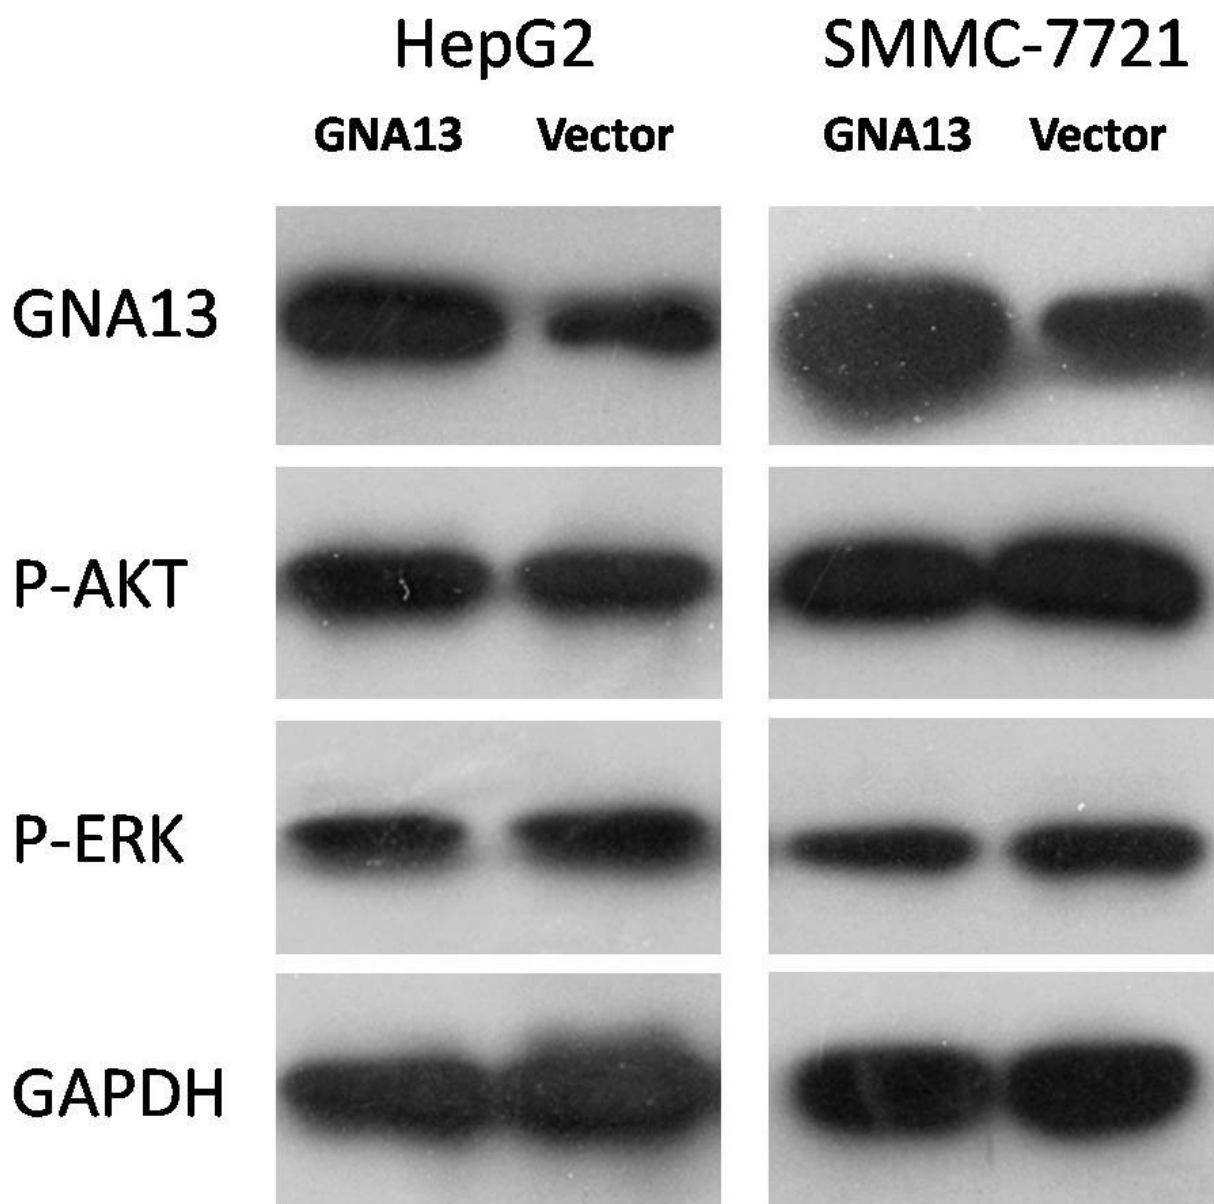

Supplement: srep35948-s1.pdf [file srep35948-s1.pdf]
